# Supplementary material
Source: PubMed Central journal article supplement (PMC5665367)
Supplement: NIHMS913087-supplement-Supplement_1.pdf [file NIHMS913087-supplement-Supplement_1.pdf]

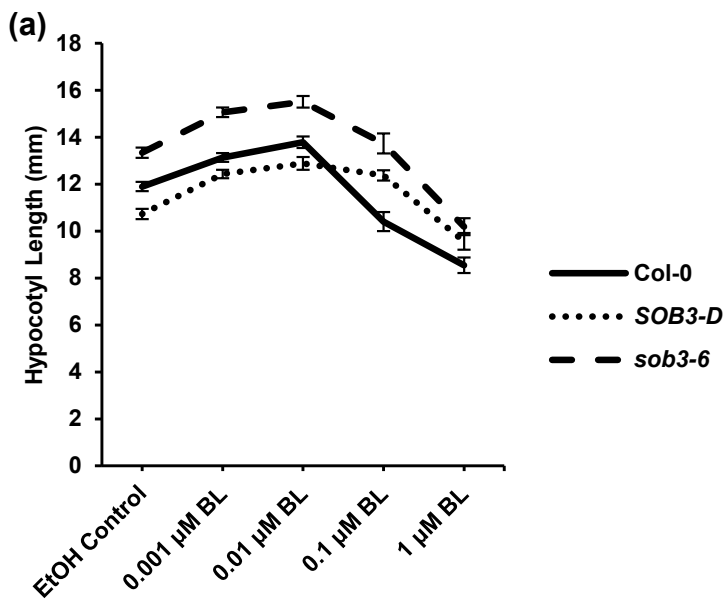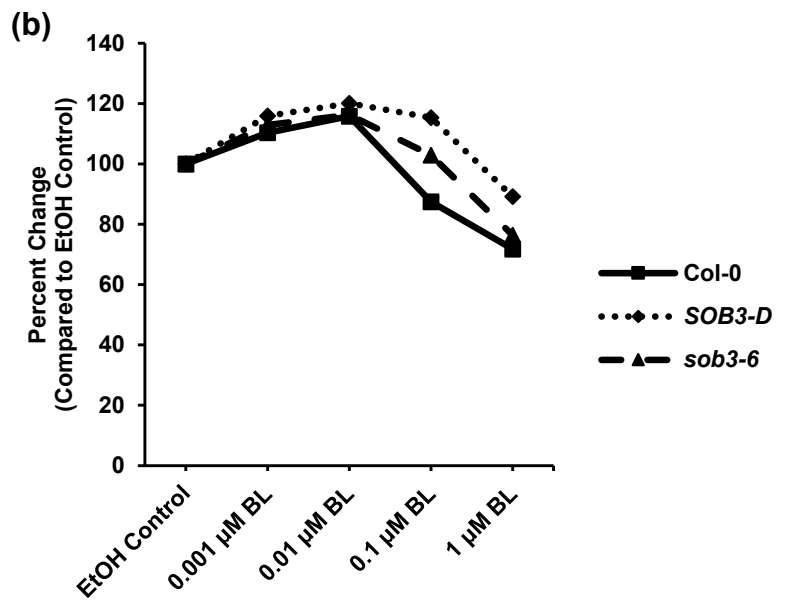

**Supplemental Figure 1: Response of *SOB3* Mutants to BL in the Dark.** Hypocotyl growth of WT Col-0, *SOB3-D*, and *sob3-6* grown for six days in the dark on media containing the specified concentrations of brassinolide (BL). EtOH- Col-0,  $n = 30$ , *SOB3-D*,  $n = 32$ ; *sob3-6*,  $n = 33$ . 0.001  $\mu$ M BL- Col-0,  $n = 42$ ; *SOB3-D*,  $n = 42$ ; *sob3-6*,  $n = 40$ . 0.01  $\mu$ M BL- Col-0,  $n = 42$ ; *SOB3-D*,  $n = 46$ ; *sob3-6*,  $n = 39$ . 0.1  $\mu$ M BL- Col-0,  $n = 46$ ; *SOB3-D*,  $n = 45$ ; *sob3-6*,  $n = 44$ . 1  $\mu$ M BL- Col-0,  $n = 50$ ; *SOB3-D*,  $n = 46$ ; *sob3-6*,  $n = 53$ . Values represent the mean of either the actual measured hypocotyl length (**a**) or the sensitivity to BL treatment (**b**) calculated as percent change in length compared to the same genotype on EtOH control plates. Error bars represent standard error of the mean.
