# Supplementary material
Source: PubMed Central journal article supplement (PMC5665367)
Supplement: NIHMS913087-supplement-Supplement_2.pdf [file NIHMS913087-supplement-Supplement_2.pdf]

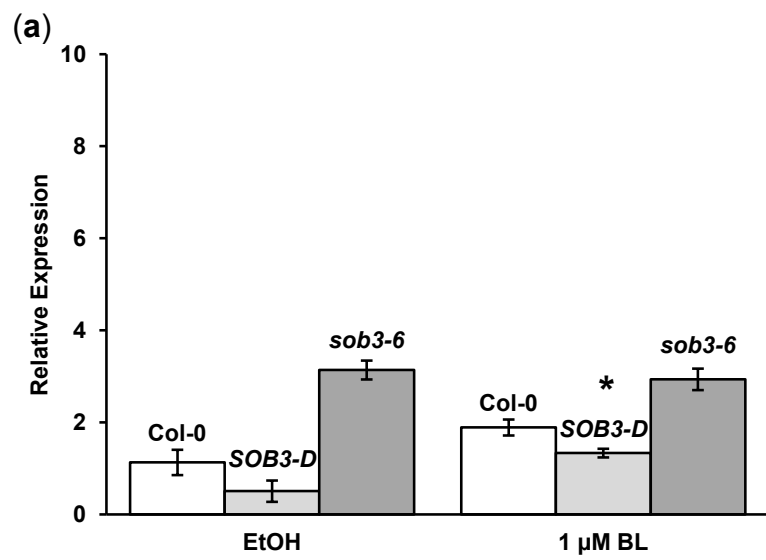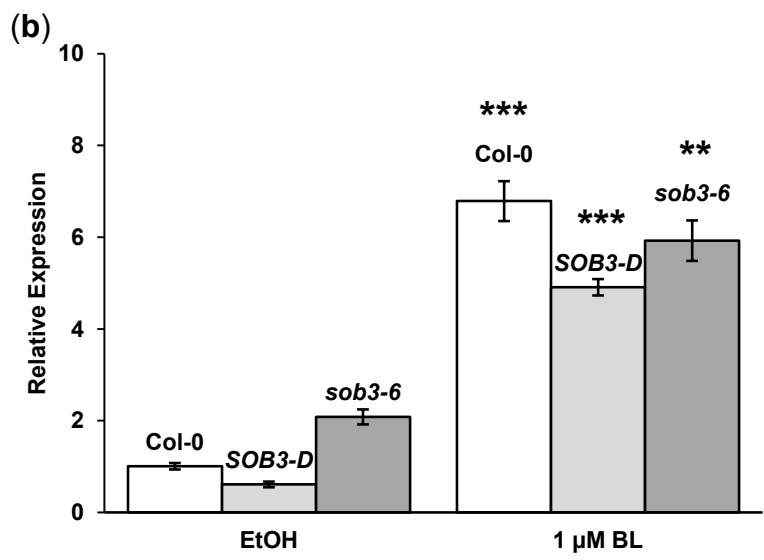

**Supplemental Figure 2: Expression Levels of SAUR22 are Induced by Brassinosteroids in WT, SOB3-D, and sob3-6.** Relative expression of SAUR22 in WT Col-0 and homozygous SOB3-D and sob3-6 four-day-old seedlings grown in either 23  $\mu\text{mol}/\text{m}^2/\text{sec}$  white light (a) or 150  $\mu\text{mol}/\text{m}^2/\text{sec}$  white light (b), as determined by qRT-PCR. Transcript levels are normalized based on the expression of the MDAR4 housekeeping gene. PCR was performed in duplicate and average expression values calculated and used for analysis. All values are shown as fold change compared to the wildtype without BL for each light condition. Error bars represent standard error of the mean from four biological replicates, except for the wildtype in dim light without BL, for which five biological replicates are used. In a Welch's *t*-test (unpaired two-tailed *t*-test with unequal variance) compared with the same genotype in the same light condition without BL \**P* < 0.05. \*\**P* < 0.01. \*\*\**P* < 0.001. The data for Col-0 are also presented in Figures 4 and S3, where they are combined with additional biological replicates from a second set of samples.
