# Supplementary material
Source: PubMed Central journal article supplement (PMC5665367)
Supplement: NIHMS913087-supplement-Supplement_3.pdf [file NIHMS913087-supplement-Supplement_3.pdf]

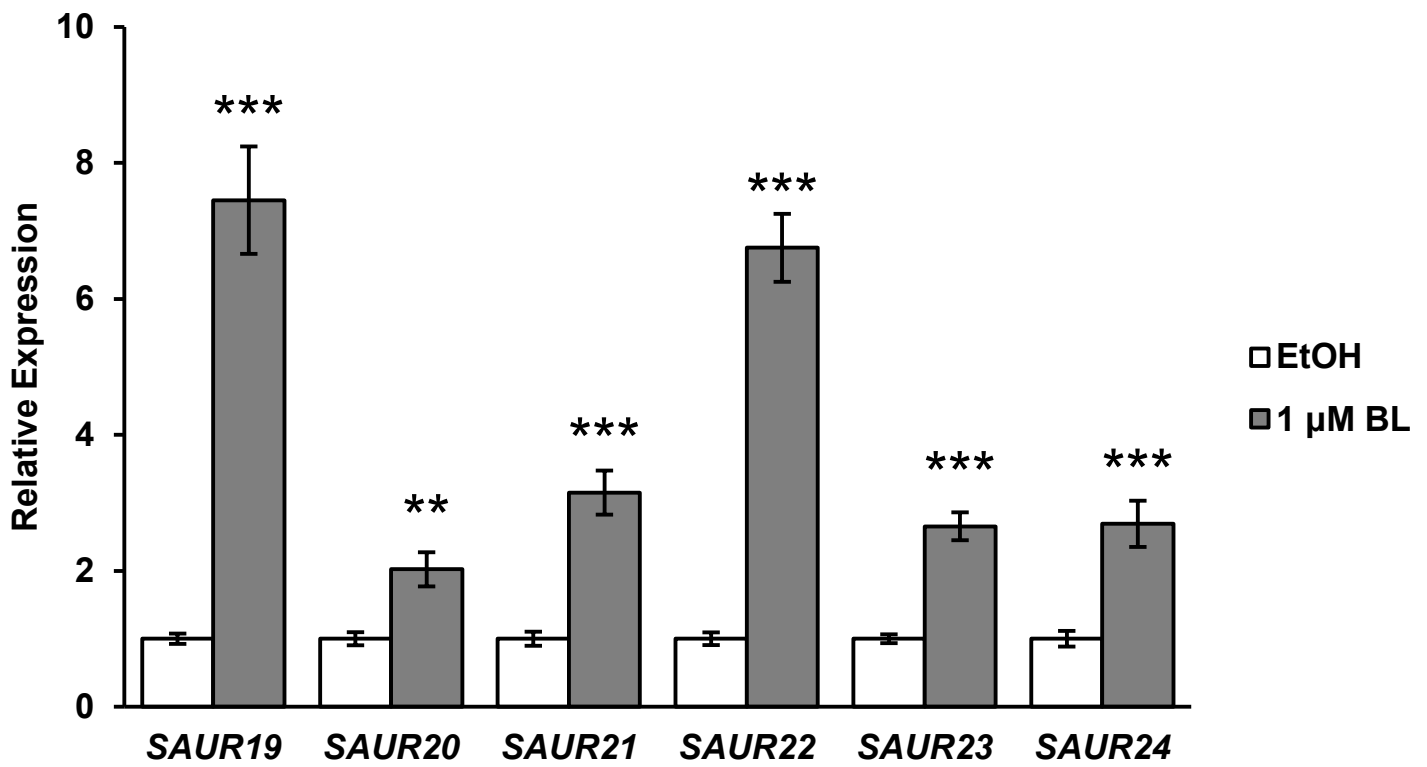

**Supplemental Figure 3: Expression Levels of SOB3 Target Genes are Affected by BL in Seedlings Grown Under Moderate-intensity White Light.** Relative expression of *SAUR19* subfamily members, which are known targets of SOB3, in Col-0 four-day-old seedlings grown in 150  $\mu\text{mol}/\text{m}^2/\text{sec}$  white light, as determined by qRT-PCR. Transcript levels are normalized based on the expression of the *MDAR4* housekeeping gene. PCR was performed in duplicate and average expression values calculated and used for analysis. All values are shown as fold change compared to the EtOH control for the same gene. Error bars represent standard error of the mean from ten biological replicates. In a Welch's *t*-test (unpaired two-tailed *t*-test with unequal variance) compared to the EtOH control for the same gene \*\* $P < 0.01$ . \*\*\* $P < 0.001$ . Note that a subset of the data for *SAUR22* are also presented in Figure S2.
