# Supplementary material
Source: PubMed Central journal article supplement (PMC5665367)
Supplement: NIHMS913087-supplement-Supplement_4.pdf [file NIHMS913087-supplement-Supplement_4.pdf]

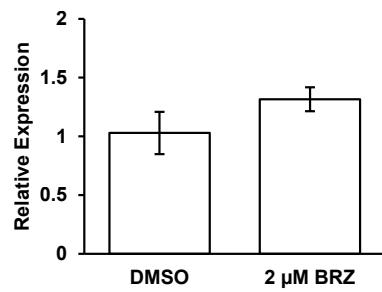

**Supplemental Figure 4: Effect of BRZ on *YUC8* Expression.**

Relative expression of *YUC8* in the WT-like line (See Methods) grown in the presence or absence of the brassinosteroid biosynthesis inhibitor BRZ, as determined by qRT-PCR. Seedlings were grown in 23  $\mu\text{mol}/\text{m}^2/\text{sec}$  white light. Transcript levels are normalized based on the expression of the *MDAR4* housekeeping gene. PCR was performed in duplicate and average expression values calculated and used for analysis. Values are shown as fold change compared to the DMSO control. Error bars represent standard error of the mean from three biological replicates.
